# Supplementary material
Source: Springer Nature journal article supplement (https://www.springermedizin.de/resource/supplementary/12879_2012_2088_MOESM1_ESM.pdf/9443540)

## Thailand

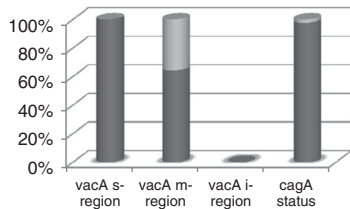

## Vietnam

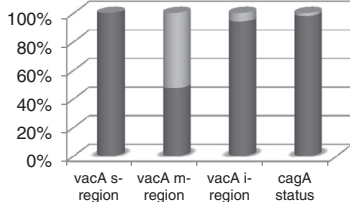

## Malaysia

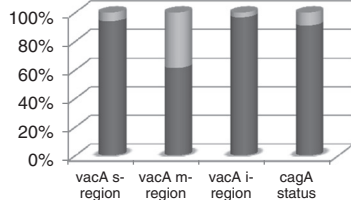

## Singapore

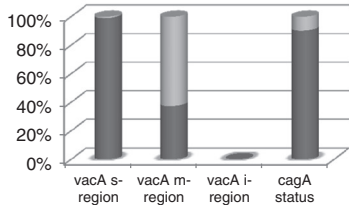

Supplement: MOESM1 [file 9443540]
